# Supplementary material
Source: PubMed Central journal article supplement (PMC2922568)
Supplement: 1005255107_pnas.1005255107_SI.pdf [file 1005255107_pnas.1005255107_SI.pdf]

# Supporting Information

Lechtenberg et al. 10.1073/pnas.1005255107

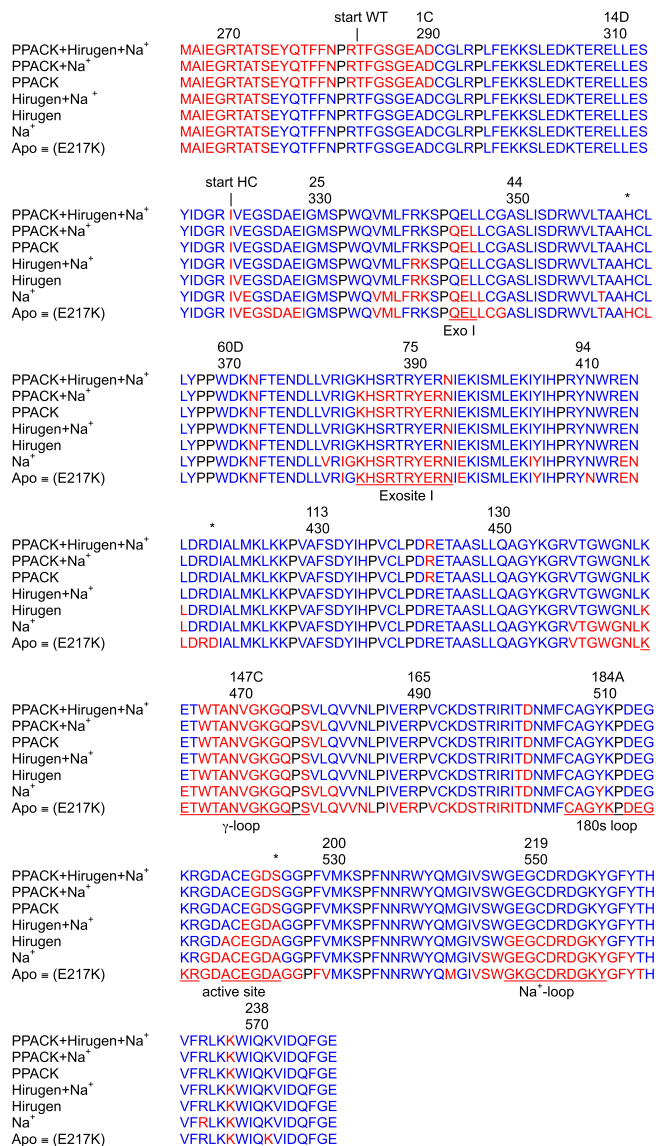

Fig. S1. "Sequence alignment" of the assignment status of the seven thrombin ligation states. Assigned residues are colored blue, unassigned residues are red, proline residues are black. Important regions are indicated. Chymotrypsin (upper) and prothrombin (lower) numbering schemes are given. The catalytic triad residues are indicated by an asterisk. Wild-type thrombin undergoes auto-cleavage in the light chain, so that it is 19 residues shorter than that of S195A thrombin (indicated).



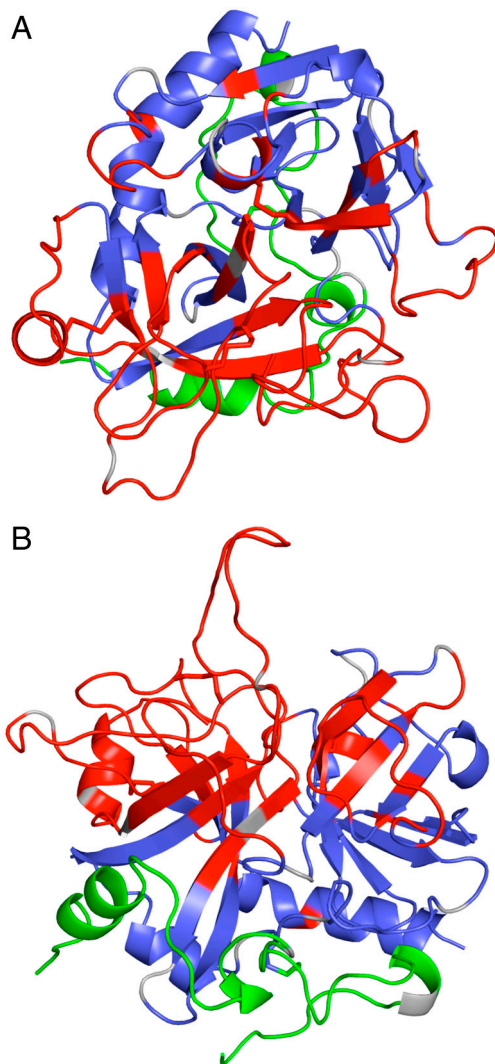

**Fig. S3.** Role of light chain in stabilizing apo thrombin. Heavy chain of apo thrombin is colored according to assignment status (blue assigned, red unassigned, and grey for prolines), with the light chain in green, in (A) standard orientation, and (B) rotated to illustrate stabilizing effect of light chain.



**Table S2. Significant chemical shift differences ( $\geq 0.1$  ppm) for each deligation event**

| Residue                                                  | $\Delta\delta$ , ppm |
|----------------------------------------------------------|----------------------|
| <b>A) Pk : Hn : Na<sup>+</sup> → Pk : Na<sup>+</sup></b> |                      |
| S27                                                      | 0.129                |
| W29                                                      | 0.123                |
| V31                                                      | 0.435                |
| M32                                                      | 0.372                |
| L33                                                      | 0.954                |
| F34                                                      | 0.835                |
| R35                                                      | 1.732                |
| K36                                                      | 1.5                  |
| S36A                                                     | 0.374                |
| L41                                                      | 0.537                |
| C42                                                      | 0.102                |
| G43                                                      | 0.127                |
| A44                                                      | 0.107                |
| S45                                                      | 0.225                |
| R50                                                      | 0.134                |
| T54                                                      | 0.162                |
| E61                                                      | 0.218                |
| N62                                                      | 0.35                 |
| L64                                                      | 0.499                |
| L65                                                      | 0.18                 |
| V66                                                      | 0.637                |
| R67                                                      | 0.627                |
| I68                                                      | 0.934                |
| G69                                                      | 0.245                |
| I79                                                      | 0.463                |
| E80                                                      | 0.415                |
| K81                                                      | 0.318                |
| I82                                                      | 0.559                |
| S83                                                      | 0.212                |
| M84                                                      | 0.14                 |
| L85                                                      | 0.166                |
| K87                                                      | 0.133                |
| I88                                                      | 0.925                |
| Y89                                                      | 0.451                |
| K109                                                     | 0.14                 |
| Y117                                                     | 0.117                |
| V138                                                     | 0.171                |
| G140                                                     | 0.377                |
| W141                                                     | 0.282                |
| G142                                                     | 0.171                |
| T147                                                     | 0.147                |
| Q156                                                     | 0.363                |
| E192                                                     | 0.136                |
| G196                                                     | 0.119                |
| F199                                                     | 0.161                |
| I242                                                     | 0.203                |
| <b>B) Pk : Hn : Na<sup>+</sup> → Hn : Na<sup>+</sup></b> |                      |
| E18                                                      | 0.158                |
| G19                                                      | 0.121                |
| A22                                                      | 0.11                 |
| W29                                                      | 0.136                |
| M32                                                      | 0.166                |
| L40                                                      | 0.755                |
| L41                                                      | 0.34                 |
| C42                                                      | 0.207                |
| G43                                                      | 0.435                |
| A44                                                      | 0.283                |
| S45                                                      | 0.155                |
| I47                                                      | 0.193                |
| S48                                                      | 0.824                |
| D49                                                      | 1.006                |
| R50                                                      | 0.624                |
| W51                                                      | 0.426                |
| V52                                                      | 0.128                |
| L53                                                      | 0.32                 |
| T54                                                      | 0.263                |
| A55                                                      | 0.14                 |
| A56                                                      | 0.121                |

| Residue | $\Delta\delta$ , ppm |
|---------|----------------------|
| H57     | 0.26                 |
| C58     | 0.339                |
| Y60A    | 0.112                |
| D60E    | 0.205                |
| K60F    | 0.217                |
| F60H    | 0.127                |
| E61     | 0.113                |
| N62     | 0.106                |
| R67     | 0.156                |
| I68     | 0.21                 |
| G69     | 0.195                |
| R73     | 0.107                |
| E77     | 0.121                |
| R77A    | 0.27                 |
| I79     | 0.396                |
| E80     | 0.213                |
| K81     | 0.565                |
| I82     | 0.392                |
| M84     | 0.209                |
| K87     | 0.148                |
| I88     | 0.411                |
| Y89     | 0.11                 |
| I90     | 0.153                |
| N95     | 0.101                |
| W96     | 0.147                |
| R97     | 0.14                 |
| E97A    | 0.102                |
| N98     | 0.259                |
| L99     | 0.576                |
| D100    | 0.116                |
| R101    | 0.318                |
| D102    | 0.206                |
| I103    | 0.321                |
| L105    | 0.267                |
| K107    | 0.252                |
| K110    | 0.159                |
| V112    | 0.15                 |
| A113    | 0.298                |
| F114    | 0.14                 |
| S115    | 0.273                |
| H119    | 0.152                |
| C122    | 0.115                |
| L123    | 1.024                |
| D125    | 0.11                 |
| E127    | 0.203                |
| T128    | 0.21                 |
| A129    | 0.352                |
| S129B   | 0.252                |
| L130    | 0.127                |
| V138    | 0.138                |
| T139    | 0.257                |
| G140    | 0.101                |
| W141    | 0.22                 |
| G142    | 0.485                |
| N143    | 0.39                 |
| L144    | 0.244                |
| K145    | 0.1                  |
| E146    | 0.219                |
| T147    | 0.133                |
| V157    | 0.199                |
| V158    | 0.147                |
| N159    | 0.102                |
| K169    | 0.124                |
| S171    | 0.111                |
| I174    | 0.253                |
| R175    | 0.171                |
| I176    | 0.241                |
| T177    | 0.275                |
| M180    | 0.221                |
| F181    | 0.245                |
| C182    | 0.204                |
| A183    | 0.31                 |

| Residue                            | $\Delta\delta$ , ppm |
|------------------------------------|----------------------|
| G184                               | 0.403                |
| Y184A                              | 0.289                |
| G188                               | 0.163                |
| D189                               | 0.319                |
| A190                               | 0.367                |
| C191                               | 1.577                |
| G196                               | 1.052                |
| G197                               | 0.659                |
| F199                               | 0.23                 |
| V200                               | 0.328                |
| M201                               | 0.142                |
| K202                               | 0.118                |
| N204B                              | 0.153                |
| N205                               | 0.116                |
| R206                               | 0.176                |
| W207                               | 0.14                 |
| Y208                               | 0.18                 |
| Q209                               | 0.366                |
| M210                               | 0.314                |
| I212                               | 0.323                |
| V213                               | 0.114                |
| S214                               | 0.595                |
| W215                               | 0.285                |
| G216                               | 1.228                |
| E217                               | 0.607                |
| G219                               | 0.812                |
| C220                               | 0.576                |
| D221                               | 0.959                |
| R221A                              | 0.287                |
| K224                               | 0.129                |
| Y225                               | 0.409                |
| G226                               | 0.459                |
| F227                               | 0.239                |
| Y228                               | 0.477                |
| T229                               | 0.154                |
| H230                               | 0.227                |
| F232                               | 0.165                |
| R233                               | 0.47                 |
| L234                               | 0.127                |
| W237                               | 0.227                |
| I238                               | 0.113                |
| Q239                               | 0.288                |
| K240                               | 0.287                |
| V241                               | 0.448                |
| I242                               | 0.497                |
| D243                               | 0.553                |
| Q244                               | 0.217                |
| G246                               | 0.313                |
| <b>C) Pk : Na<sup>+</sup> → Pk</b> |                      |
| V17                                | 0.13                 |
| L41                                | 0.108                |
| S48                                | 0.126                |
| A113                               | 0.1                  |
| N159                               | 0.123                |
| L160                               | 0.119                |
| I162                               | 0.103                |
| R173                               | 0.584                |
| C182                               | 0.136                |
| A183                               | 0.15                 |
| G184                               | 0.183                |
| Y184A                              | 0.129                |
| K185                               | 0.564                |
| K186D                              | 0.139                |
| R187                               | 0.15                 |
| G188                               | 0.134                |
| C191                               | 0.129                |
| E217                               | 0.38                 |
| G219                               | 0.161                |
| C220                               | 0.229                |
| D221                               | 0.143                |
| R221A                              | 0.702                |

| Residue                                        | $\Delta\delta$ , ppm |
|------------------------------------------------|----------------------|
| G223                                           | 0.252                |
| K224                                           | 0.448                |
| Y225                                           | 0.25                 |
| G226                                           | 0.116                |
| <b>D) Pk : Na<sup>+</sup> → Na<sup>+</sup></b> |                      |
| A22                                            | 0.146                |
| W29                                            | 0.107                |
| C42                                            | 0.222                |
| G43                                            | 0.472                |
| A44                                            | 0.208                |
| S45                                            | 0.15                 |
| L46                                            | 0.106                |
| I47                                            | 0.174                |
| S48                                            | 0.819                |
| D49                                            | 0.978                |
| R50                                            | 0.506                |
| W51                                            | 0.409                |
| V52                                            | 0.134                |
| L53                                            | 0.346                |
| A55                                            | 0.116                |
| A56                                            | 0.1                  |
| H57                                            | 0.258                |
| C58                                            | 0.305                |
| L60                                            | 0.229                |
| W60D                                           | 0.115                |
| D60E                                           | 0.16                 |
| K60F                                           | 0.203                |
| F60H                                           | 0.196                |
| R67                                            | 0.109                |
| K81                                            | 0.18                 |
| S83                                            | 0.194                |
| I90                                            | 0.147                |
| W96                                            | 0.142                |
| R97                                            | 0.16                 |
| D100                                           | 0.119                |
| R101                                           | 0.332                |
| D102                                           | 0.21                 |
| I103                                           | 0.298                |
| L105                                           | 0.228                |
| K107                                           | 0.226                |
| K110                                           | 0.146                |
| V112                                           | 0.17                 |
| A113                                           | 0.195                |
| S115                                           | 0.26                 |
| H119                                           | 0.157                |
| C122                                           | 0.109                |
| L123                                           | 1.028                |
| E127                                           | 0.205                |
| T128                                           | 0.208                |
| A129                                           | 0.345                |
| S129B                                          | 0.249                |
| L130                                           | 0.121                |
| Y134                                           | 0.128                |
| V157                                           | 0.172                |
| E164                                           | 0.136                |
| K169                                           | 0.126                |
| T172                                           | 0.111                |
| I174                                           | 0.281                |
| R175                                           | 0.177                |
| I176                                           | 0.263                |
| M180                                           | 0.212                |
| F181                                           | 0.244                |
| C182                                           | 0.201                |
| A183                                           | 0.308                |
| G184                                           | 0.385                |
| G196                                           | 1.099                |
| G197                                           | 0.577                |
| F199                                           | 0.151                |
| V200                                           | 0.297                |
| M201                                           | 0.112                |
| K202                                           | 0.124                |



| Residue                                        | $\Delta\delta$ , ppm |
|------------------------------------------------|----------------------|
| F204A                                          | 0.119                |
| N204B                                          | 0.141                |
| N205                                           | 0.106                |
| R206                                           | 0.166                |
| W207                                           | 0.153                |
| Y208                                           | 0.175                |
| Q209                                           | 0.371                |
| M210                                           | 0.302                |
| I212                                           | 0.328                |
| V213                                           | 0.103                |
| T229                                           | 0.173                |
| H230                                           | 0.208                |
| F232                                           | 0.158                |
| L234                                           | 0.12                 |
| W237                                           | 0.226                |
| I238                                           | 0.137                |
| Q239                                           | 0.291                |
| K240                                           | 0.297                |
| V241                                           | 0.445                |
| I242                                           | 0.432                |
| D243                                           | 0.53                 |
| Q244                                           | 0.223                |
| G246                                           | 0.324                |
| <b>E) Hn : Na<sup>+</sup> → Hn</b>             |                      |
| C168                                           | 0.176                |
| G184                                           | 0.28                 |
| Y184A                                          | 0.19                 |
| K185                                           | 0.283                |
| E186B                                          | 0.148                |
| G186C                                          | 0.154                |
| K186D                                          | 0.155                |
| R187                                           | 0.112                |
| G188                                           | 0.205                |
| D189                                           | 0.39                 |
| W215                                           | 0.116                |
| G226                                           | 0.18                 |
| T229                                           | 0.133                |
| <b>F) Hn : Na<sup>+</sup> → Na<sup>+</sup></b> |                      |
| G19                                            | 0.106                |
| S27                                            | 0.129                |
| Q30                                            | 0.102                |
| S36A                                           | 0.363                |
| C42                                            | 0.103                |
| G43                                            | 0.103                |
| S45                                            | 0.214                |
| L60                                            | 0.407                |
| T60I                                           | 0.104                |
| E61                                            | 0.12                 |
| N62                                            | 0.252                |
| L64                                            | 0.498                |
| L65                                            | 0.13                 |
| R67                                            | 0.378                |
| K81                                            | 0.289                |
| I82                                            | 0.224                |
| M84                                            | 0.1                  |
| L85                                            | 0.121                |
| L108                                           | 0.106                |
| Y117                                           | 0.123                |
| R187                                           | 0.105                |
| <b>G) Hn → Apo (E217K)</b>                     |                      |
| G25                                            | 0.125                |
| S27                                            | 0.171                |
| Q30                                            | 0.299                |
| F34                                            | 1.193                |
| S36A                                           | 0.266                |
| S45                                            | 0.367                |
| W51                                            | 0.122                |
| L53                                            | 0.164                |
| A56                                            | 0.103                |



| Residue                                | $\Delta\delta$ , ppm |
|----------------------------------------|----------------------|
| T128                                   | 0.186                |
| A129                                   | 0.357                |
| A129A                                  | 0.103                |
| S129B                                  | 0.248                |
| L130                                   | 0.172                |
| Q131                                   | 0.114                |
| A132                                   | 0.133                |
| Y134                                   | 0.175                |
| N179                                   | 0.182                |
| M180                                   | 0.325                |
| F181                                   | 0.257                |
| K202                                   | 0.187                |
| F204A                                  | 0.13                 |
| N204B                                  | 0.104                |
| N205                                   | 0.15                 |
| R206                                   | 0.136                |
| W207                                   | 0.135                |
| Y208                                   | 0.154                |
| Q209                                   | 0.409                |
| G211                                   | 0.158                |
| I212                                   | 0.368                |
| H230                                   | 0.147                |
| V231                                   | 0.102                |
| F232                                   | 0.154                |
| R233                                   | 0.635                |
| L234                                   | 0.135                |
| W237                                   | 0.254                |
| Q239                                   | 0.272                |
| V241                                   | 0.38                 |
| I242                                   | 0.448                |
| D243                                   | 0.477                |
| Q244                                   | 0.113                |
| G246                                   | 0.310                |
| <b>I) Na<sup>+</sup> → Apo (E217K)</b> |                      |
| Q30                                    | 0.19                 |
| S36A                                   | 0.109                |
| S45                                    | 0.144                |
| L53                                    | 0.194                |
| A56                                    | 0.109                |
| L60                                    | 0.383                |
| Y60A                                   | 0.114                |
| R67                                    | 0.169                |
| K81                                    | 0.105                |
| I82                                    | 0.183                |
| S83                                    | 0.177                |
| Y94                                    | 0.157                |
| W96                                    | 0.219                |
| N179                                   | 0.123                |
| M180                                   | 0.152                |
| F181                                   | 0.334                |
| H230                                   | 0.168                |
